# Supplementary material
Source: Research Square preprint supplement (doi:10.21203/rs.3.rs-10136481/v1)
Supplement: Supplementary file 1 [file 5d82187d83fc6ccf18e89f24.docx]

Bioinformatics Analysis

# Error Correction and Depth Normalization

**Scripts:** 01_invitro_qc_pipeline.py, 02_diversity_metrics.py

Raw barcode sequencing reads were processed through a unified quality-control pipeline. Each input file contained tab-separated records with the format: count, percent, length, barcode sequence, and UMI count. Barcodes containing non-canonical bases (i.e., characters outside {A, T, C, G, N}) were excluded. A greedy 1-bp adjacency network error correction algorithm was applied to collapse PCR and sequencing errors into their most abundant core clones. Specifically, for each barcode, all possible 1-bp neighbors were generated by exhaustive enumeration of single-nucleotide substitutions, deletions, and insertions. Barcodes were then sorted by descending UMI abundance; each core clone absorbed all 1-bp neighbor barcodes that had not already been assigned to a higher-abundance clone, with UMI counts aggregated into the core sequence.

Following error correction, barcode counts were subjected to stage-specific multinomial downsampling (random seed = 42) to the minimum total UMI depth within each biological stage, thereby eliminating sequencing depth bias across samples. The target depths were: Plasmid, 736,197 reads; P1-B19G, 2,945,431 reads; and EnvA, 1,775,959 reads. The resulting normalized files, together with a unified metadata table (Normalized_Metadata.csv), were used for all downstream diversity analyses.

## Diversity Metrics

Absolute barcode diversity was defined as the number of unique barcodes with UMI count > 0 in the normalized dataset. Shannon entropy () was computed from the UMI frequency distribution as:

where denotes the relative UMI frequency of barcode . Effective library capacity () was calculated as:

All diversity metrics were computed on stage-normalized data to ensure fair cross-group comparisons.

# UMI Rarefaction Analysis

**Scripts:** plot_fig3_panel_b_umi_saturation.py

Rarefaction curves were generated for the EnvA-pseudotyped libraries using a mathematical expectation approach rather than stochastic resampling, ensuring deterministic and reproducible results. For each library, unique barcode accumulation was estimated as:

where denotes the relative UMI frequency of barcode in the normalized dataset and the cumulative read depth. Fifty uniformly spaced depth intervals spanning from zero to the total read count were evaluated. All rarefaction curves were generated from the stage-normalized, error-corrected datasets to ensure comparability across groups.

## Rank-Abundance Analysis

**Scripts:** plot_fig3_panel_e_frequency_flags.py, plot_fig3_panel_f_rank_abundance.py

Barcode UMI counts from the normalized EnvA datasets were sorted in descending order. The per-barcode UMI ratio was expressed as a percentage of total reads and plotted against the -transformed barcode rank to visualize clonal frequency spectra. Total barcode richness was annotated on each curve as a vertical drop-line flag at the maximum rank position.

For cumulative representation, the cumulative read fraction was computed as the running sum of per-barcode UMI ratios and plotted against the -transformed barcode rank. The 50% cumulative threshold was used to quantify the number of dominant clones accounting for half of the total reads in each library.

# Barcode Sequence Space Analysis

**Scripts:** 03_levenshtein_collision_analysis.py, plot_fig3_panel_g_collision_histogram.py, plot_S3_levenshtein_collision_analysis.py

To assess the proximity of barcode sequences in edit-distance space, a Monte Carlo sampling procedure was performed on the stage-normalized datasets. For each sample, molecules were drawn with replacement, with sampling probabilities weighted by UMI abundance (random seed = 42). Pairwise Levenshtein edit distances were computed for all unique pairs among the sampled molecules.

For the main analysis focused on the final EnvA-pseudotyped libraries (Figure 3G), 2,000 molecules were sampled per library ( pairs), and the distance distributions were visualized as step histograms with 1-bp bins. The barcode collision rate was defined as the percentage of pairs with zero edit distance, and the mean Levenshtein distance was computed to verify that the barcode design space provided sufficient sequence separation across the three library designs.

For supplementary analysis spanning all biological stages (Supplementary Figure S3), 1,500 molecules were sampled per sample ( pairs), and the resulting distance distributions were stratified by both library group and production stage to track sequence-space evolution throughout library production.

# Clonal Fidelity Analysis

**Scripts:** 04_clonal_correlation_analysis.py, plot_S3_Clonal_Correlation.ipynb

To assess the consistency of barcode representation between library production stages, clonal fidelity analysis was performed by comparing barcode frequencies in the Plasmid (input) and EnvA-pseudotyped (output) libraries. For each group, barcode UMI frequencies from the stage-normalized datasets were expressed as percentages of total reads. Shared barcodes were identified by inner join on the barcode sequence, and Spearman’s rank correlation coefficient () was computed between the Plasmid and EnvA frequency vectors to quantify rank-order preservation. Results were visualized as log-log scatter plots with a diagonal line representing perfect fidelity (), with the Spearman and shared barcode count annotated on each panel.

# In Vivo Data Preprocessing

**Scripts:** 00_build_master_dataset.py, 01_data_cleaning_and_clustering.py

## Master Dataset Construction

For in vivo trans-synaptic tracing samples, raw single-cell barcode sequencing data from droplet-based profiling of V1 (starter cell site) and LGN (presynaptic input region) were consolidated into a unified master dataset driven by a metadata manifest (00_build_master_dataset.py). Each raw input file contained tab-separated records of UMI counts per unique rabies virus barcode per single cell, with metadata columns annotating experimental group, brain region, and biological replicate.

## Anchor-First Preprocessing Pipeline

A conservative “anchor-first” preprocessing pipeline was applied to eliminate technical noise before clonal consolidation (01_data_cleaning_and_clustering.py). In Phase 1, two stringent quality filters were applied:

1. **Absolute threshold:** UMI-Kinds , removing singleton and doubleton artifacts likely arising from template-switching events during reverse transcription.
2. **Relative intra-cellular fraction threshold:** 5%, whereby any barcode whose UMI count accounted for less than 5% of the total UMI yield within that host cell was discarded as probable ambient RNA contamination.

The surviving high-confidence “anchor” sequences were then passed to Phase 2: a 1-bp Levenshtein greedy clonal consolidation algorithm identical in principle to the in vitro error correction pipeline, but applied strictly within biological boundaries (Group BrainRegion Replicate) to prevent artificial merging across independent samples. Within each boundary partition, barcodes were sorted by descending UMI abundance, and each core anchor absorbed all 1-bp neighbor barcodes not already assigned to a higher-abundance clone. UMI counts were aggregated into the corrected core sequence, and duplicate entries within the same host cell were collapsed. The resulting master corrected dataset (MasterCorrectedData.csv) served as the unified input for all downstream in vivo diversity and collision analyses.

# In Vivo Diversity Metrics

**Scripts:** 02_diversity_metrics.py, plot_fig4_Library_Diversity.py

From the corrected dataset, the following metrics were calculated for each experimental group brain region biological replicate combination:

- **Absolute Barcode Diversity:** the total number of unique RV-barcodes recovered.
- **Total UMIs:** the aggregate sequencing depth serving as a normalization baseline.
- **Shannon Entropy () and Effective Barcode Capacity ():** information-theoretic metrics computed from the UMI frequency distribution of RV-barcodes within each sample, quantifying information-carrying capacity accounting for both richness and evenness.
- **Information Density:** unique barcodes per 10,000 UMIs (unique barcodes / total UMIs 10,000), serving as a sequencing efficiency metric that normalizes diversity against variable sequencing depth across samples.

All metrics were computed separately for V1 and LGN samples, with biological replicates per group for V1 and LGN. Results were visualized as grouped bar plots with overlaid individual replicate points (plot_fig4_Library_Diversity.py).

# In Vivo Rarefaction Analysis

**Scripts:** 03_rarefaction.py, plot_fig4_Rarefaction_Analysis.py

Rarefaction analysis was conducted on the corrected in vivo trans-synaptic data to evaluate library saturation in both V1 and LGN. For each biological replicate, random sampling without replacement was simulated on the pool of valid cell-barcode observations, independently for each brain region, with a step size of 500 observations and a fixed random seed (42). At each sampling point, the cumulative count of unique RV-barcodes discovered was recorded, generating rarefaction coordinates (Sampled_Observations, Unique_Barcodes) that captured the relationship between sampling effort and observed diversity. Rarefaction curves were plotted independently for each replicate, faceted by brain region, to assess inter-animal reproducibility (plot_fig4_Rarefaction_Analysis.py).

# Dual-Resolution Collision Analysis

**Scripts:** plot_fig5C_barcode_centric.py, plot_fig5DE_cell_centric.py

A dual-resolution collision assessment strategy was implemented to systematically quantify both the structural purity of the viral library and its downstream biological footprint.

## Barcode-Centric Resolution

Barcode-centric resolution evaluated the physical composition of the viral library prior to biological amplification. For each experimental group, brain region, and biological replicate, each unique RV-barcode was classified by the number of distinct host cells it infected. Barcodes were categorized into four collision severity levels: Unique (1 cell), Low (2 cells), Medium (3 cells), and High ($>$3 cells). The proportional distribution of barcode species across these collision levels was calculated as a percentage of total barcode species, providing a direct readout of library structural purity (plot_fig5C_barcode_centric.py).

## Cell-Centric Resolution

Cell-centric resolution evaluated the biological footprint by quantifying the proportion of host neurons corrupted by collision-induced ambiguity. For each host cell (identified by unique cell barcode), the maximum infection counts among all RV-barcodes detected within that cell was determined. Cells harboring exclusively unique barcodes (maximum infection count ) were classified as collision-free, whereas cells containing any barcode that also infected another cell (maximum infection count ) were classified as collision-affected. The proportion of collision-free versus collision-affected host cells was quantified for each group region replicate combination, providing a direct functional measure of collision-induced topological distortion at the cellular level (plot_fig5DE_cell_centric.py).

# Cell-Centric Network Topology Reconstruction

A cell-centric framework was implemented for all network topology analyses (Fig. 6), wherein each V1 source neuron — rather than each viral barcode — constitutes the fundamental voting unit. This approach directly addresses a critical artifact inherent to barcode-centric analyses: collision barcodes that infect distinct V1 cells contribute their inflated trans-synaptic footprint times, systematically amplifying the apparent divergence of collision-prone viral libraries.

## Pure Network Edges

Pure trans-synaptic edges were defined as unique (V1 cell, LGN cell) pairs mediated exclusively by globally singlet RV-barcodes — those detected in exactly one V1 cell across the entire dataset. For each replicate, V1 cells carrying singlet barcodes were identified, and their LGN targets traced via barcode matching:

where *Singlets* denotes the set of barcodes observed in exactly one V1 cell. Only unique (V1 cell, LGN cell) pairs were counted, ensuring each physical connection contributes a single tally regardless of UMI multiplicity.

## Network Divergence (LGN Out-Degree)

LGN divergence was quantified as the mean number of distinct V1 source cells projecting to each LGN target cell:

Each V1 cell contributes one vote irrespective of the collision status of its incoming barcodes.

## Network Convergence (V1 In-Degree)

V1 convergence was quantified under the strict cell-centric framework. For each V1 source cell, the total set of distinct LGN targets reached via all barcodes carried by that cell was enumerated:

where is the set of all barcodes detected in V1 cell . In collision scenarios, a barcode shared across multiple V1 cells contributes its full LGN target set to each host cell — the defining mechanism by which collision amplifies apparent convergence.

Mean V1 in-degree was computed per replicate and reported as mean SD across biological replicates per group. Per-replicate in-degree values were individually reported to assess inter-animal variability. The full per-cell in-degree distribution was visualized as a step histogram (bin width , proportion-normalized per group, -axis truncated at 40) to characterize the convergence landscape and identify right-tail inflation indicative of collision-driven false-positive hubs.

# Statistical Analysis

All comparisons were performed using Welch’s unequal variances t-test (two-tailed) or one-way / two-way ANOVA with Bonferroni post-hoc correction as indicated. Data are presented as mean SD or mean SEM as specified in individual figure legends.

**P-value thresholds:** , , , , (trend-level).

## Figure-Specific Statistical Tests

| Figure | Test | Detail |
| --- | --- | --- |
| Fig 1B | One-way ANOVA | M protein dose optimization |
| Fig 1C, 1D, 1E | Welch’s t-test + Bonferroni | Rescue efficiency, infectious titer (within ribozyme-optimization groups) |
| Fig 1E | Welch’s t-test | D3 vs. D6 comparison within HH+HDV |
| Fig 2C, 2D | Welch’s t-test + Bonferroni | CVS-N2c titer (pairwise vs. HH+HdVRz) |
| Fig 2D | Two-way ANOVA + Bonferroni | Longitudinal titer kinetics (group time, at peak time point) |
| Fig 3 | No inferential tests | In vitro barcode diversity (single replicate) |
| Fig 4 | One-way ANOVA + post-hoc | In vivo diversity |
| Fig 6 | Welch’s t-test | Primary contrast: HH+HdVRz vs. HH+Twister; Secondary: HH+HdVRz vs. RzB+Twister (reported where methodologically informative) |

# Software and Reproducibility

All analyses were performed using Python (version ) with the following packages: NumPy, pandas, SciPy, Matplotlib, and Seaborn. Levenshtein edit distances were computed using the python-Levenshtein package. All random sampling operations were performed with a fixed seed (42) to ensure reproducibility.
