# Supplementary material
Source: Research Square preprint supplement (doi:10.21203/rs.3.rs-10136481/v1)
Supplement: Supplementary file 2 [file b42f7c3703a8202a8267776e.xlsx]

## Sheet: Ribozyme sequence
5'Rz
HH	TTAAGCGTCTGATGAGTCCGTGAGGACGAAACCCGGCGTACCGGGTC
RzB	ttgttaTAAagcgtCTGATGAGTCGCTGGGATGCGACGAAACGCCTTCGGGCGTCac
mirrorTwister	agcgtGGGAGGTGAAAATAGGCCCGAACCCTGGCCGTAACCGTCACAAT
mirrorT3H48	Cgcgcaaagcaggataaaccctgagcagtcgacctacatgcgcaaaggcgcttaggtcctgcgcg
3'Rz
HDV	GGCCGGCATGGTCCCAGCCTCCTCGCTGGCGCCGGCTGGGCAACATGTTCGGCATGGCGAATGGGAC
Twister	aagcgtAACACTGCCAATGCCGGTCCCAAGCCCGGATAAAAGTGGAGGGcgctt
HdVRz	GGGTCGGCATGGCATCTCCACCTCCTCGCGGTCCGACCTGGGCATCCGAAGGAGGACGCACGTCCACTCGGATGGCTAAGGGAGGG

## Sheet: Virus Titer
	Titer(i.u./mL)	dil.	Volume
AAV2-retro-syn-mCre	1.28E13	1.8x	250nL	cre：TVA：G=2：1：1
AAV-TREtight-mTagBFP2-N2cG	5.83E12	10x
AAVI-syn-FLEX-sTpEptTA	4.19E12	10x
CVS-N2cΔG-N-20nt-4mCherry (HH + HdVRz)(EnvA)	1.09E10		250nL
CVS-N2cΔG-N-20nt-4EGFP (HH + Twister)(EnvA)	1.55E9		250nL
CVS-N2cΔG-N-20nt-4EGFP (RzB + Twister)(EnvA)	2.29E9		250nL

## Sheet: index
library name	Illumina i7 Index	Illumina i5 Index (Reverse)
mL-1	CGCTCAGTTC	CGCTCCACGA
mL-2	TATCTGACCT	TATCTTGTAG
mL-3	TCGGATGTCG	AATGAACGTA
6L-2	CTTATGGAAT	CCACCAGGCA
6L-3	TCCTATTGTG	CTCGGATGGA
6L-4	GCGCGATGTT	ACAAGTGGAC
2L-1	AGAGCACTAG	TACTGTTCCA
2L-2	TGCCTTGATC	ATTAACAAGG
2L-3	CTACTCAGTC	CACTATCAAC
mV-1	TCGTCTGACT	TGTCGCTGGT
mV-2	GAACATACGG	ACAGTGTATG
mV-3	CCTATGACTC	AGCGCCACAC
2V-1	TAATGGCAAG	CCTTCGTGAT
2V-2	GTGCCGCTTC	AGTAGAGCCG
2V-3	CGGCAATGGA	TCGTGCATTC
6V-2	GCCGTAACCG	CTATAGTCTT
6V-3	AACCATTCTC	TTGCTGCCGA
6V-4	GGTTGCCTCT	CCATCATTAG
