# Supplementary material
Source: Research Square preprint supplement (doi:10.21203/rs.3.rs-10136481/v1)
Supplement: Supplementary file 3 [file ba84c275a4626bc1d1b78468.xlsx]

## Sheet: Table 1-Fig1b
M quantity(ug/well)	RzB + HdVRz D3			RzB + HdVRz D6			HH + HdVRz D3			HH + HdVRz D6
0	0.28	0.31	0.51	0.47	0.25	0.45	0.29	0.26	0.31	0.32	0.16	0.3
0.15	20.9	11.81	9.44	0.8	0.71	1.53	1.92	0.32	0.65	0.19	0.32	0.37
0.3	36.94	41.78	31	3.22	3.56	3.57	4.36	1.95	1.62	1.13	0.89	0.71
0.4	63.56	61.61	57.43	5.76	5.37	6.67	6.4	6.4	2.83	2.06	1.43	1.26
0.6	57.68	44.44	62.8	11.99	13.43	17.85	7.5	2.96	4.6	1.1	1.9	3.42
0.8	53.61	44.92	63.92	10.6	11.98	18.22	2.73	3.36	1.56	1.26	0.92	4.18
1	33.21	49.9	47.7	11.19	12.8	22.81	4.02	1.9	3.23	1.31	2.59	2.9
1.2	45.62	26.11	49.52	12.42	13.51	20.16	2.35	1.99	2.41	2.33	1.97	3.3

## Sheet: Table 2-Fig1c 
Group	Percentage of EGFP(%)
HH + HdVRz	0.0591716			Comparison Group	Control Group	t-statistic	p-value (raw)	Adjusted p-value (Bonferroni)	Significance
HH + HdVRz	0			HH + HDV	HH + HdVRz	-8.21769	1.19308e-06	1.07377e-05	***
HH + HdVRz	0			HH + Twister	HH + HdVRz	-5.6715	0.000413474	0.00372127	**
HH + HdVRz	0			RzB + HdVRz	HH + HdVRz	-3.20612	0.0111854	0.100669	ns
HH + HdVRz	0.0524934			RzB + HDV	HH + HdVRz	-9.05737	1.4519e-05	0.000130671	***
HH + HdVRz	0.0547945			RzB + Twister	HH + HdVRz	-7.10337	0.000117459	0.00105713	**
HH + HdVRz	0.0601685			mirrorTwister + Twister	HH + HdVRz	0.32057	0.75465	1	ns
HH + HdVRz	0.175234			mirrorT3H48 + Twister	HH + HdVRz	1.21017	0.249258	1	ns
HH + HDV	0.357622			mirrorT3H48 + HdVRz	HH + HdVRz	-3.53807	0.00568189	0.051137	ns
HH + HDV	0.304745			Twister-SA + Twister-SD	HH + HdVRz	0.352124	0.729991	1	ns
HH + HDV	0.348953
HH + HDV	0.268216
HH + HDV	0.339806			Group Statistics Summary
HH + HDV	0.404676
HH + HDV	0.188235			Group	N	Mean	SD	SEM	Mean ± SEM
HH + HDV	0.263968			HH + HdVRz	8	0.050233	0.057817	0.020441	0.050233 ± 0.020441
HH + Twister	0.609261			HH + HDV	8	0.309528	0.067986	0.024037	0.309528 ± 0.024037
HH + Twister	0.437637			HH + Twister	8	0.448521	0.190029	0.067185	0.448521 ± 0.067185
HH + Twister	0.166806			RzB + HdVRz	8	0.247518	0.16416	0.058039	0.247518 ± 0.058039
HH + Twister	0.317083			RzB + HDV	8	0.695428	0.193007	0.068238	0.695428 ± 0.068238
HH + Twister	0.368852			RzB + Twister	8	0.686539	0.24668	0.087215	0.686539 ± 0.087215
HH + Twister	0.63593			mirrorTwister + Twister	8	0.042774	0.031439	0.011115	0.042774 ± 0.011115
HH + Twister	0.722022			mirrorT3H48 + Twister	8	0.020581	0.038209	0.013509	0.020581 ± 0.013509
HH + Twister	0.330579			mirrorT3H48 + HdVRz	8	0.228773	0.130495	0.046137	0.228773 ± 0.046137
RzB + HdVRz	0.129032			Twister-SA + Twister-SD	8	0.039974	0.058714	0.020759	0.039974 ± 0.020759
RzB + HdVRz	0.096432			Twister-SA + Twister-SD (nec)	8	0	0	0	0.000000 ± 0.000000
RzB + HdVRz	0.280374			RzB + Twister (neg)	8	0	0	0	0.000000 ± 0.000000
RzB + HdVRz	0.542005
RzB + HdVRz	0.182315
RzB + HdVRz	0.442087			Note: SEM = SD / √N
RzB + HdVRz	0.200602
RzB + HdVRz	0.107296
RzB + HDV	0.775194
RzB + HDV	0.701754
RzB + HDV	0.575816
RzB + HDV	0.678295
RzB + HDV	0.911854
RzB + HDV	0.471698
RzB + HDV	0.990099
RzB + HDV	0.458716
RzB + Twister	0.794552
RzB + Twister	0.966608
RzB + Twister	0.542005
RzB + Twister	1.01266
RzB + Twister	0.433651
RzB + Twister	0.760135
RzB + Twister	0.668896
RzB + Twister	0.313808
mirrorTwister + Twister	0.0582072
mirrorTwister + Twister	0
mirrorTwister + Twister	0.0499501
mirrorTwister + Twister	0.0970403
mirrorTwister + Twister	0.0452694
mirrorTwister + Twister	0.0459137
mirrorTwister + Twister	0
mirrorTwister + Twister	0.0458085
mirrorT3H48 + Twister	0
mirrorT3H48 + Twister	0
mirrorT3H48 + Twister	0.0874891
mirrorT3H48 + Twister	0
mirrorT3H48 + Twister	0
mirrorT3H48 + Twister	0.0771605
mirrorT3H48 + Twister	0
mirrorT3H48 + Twister	0
mirrorT3H48 + HdVRz	0.288739
mirrorT3H48 + HdVRz	0.352268
mirrorT3H48 + HdVRz	0.353201
mirrorT3H48 + HdVRz	0.0464468
mirrorT3H48 + HdVRz	0.306614
mirrorT3H48 + HdVRz	0.131119
mirrorT3H48 + HdVRz	0.299273
mirrorT3H48 + HdVRz	0.052521
Twister-SA + Twister-SD	0
Twister-SA + Twister-SD	0.132538
Twister-SA + Twister-SD	0
Twister-SA + Twister-SD	0.123762
Twister-SA + Twister-SD	0
Twister-SA + Twister-SD	0.0634921
Twister-SA + Twister-SD	0
Twister-SA + Twister-SD	0
Twister-SA + Twister-SD (neg)	0
Twister-SA + Twister-SD (neg)	0
Twister-SA + Twister-SD (neg)	0
Twister-SA + Twister-SD (neg)	0
Twister-SA + Twister-SD (neg)	0
Twister-SA + Twister-SD (neg)	0
Twister-SA + Twister-SD (neg)	0
Twister-SA + Twister-SD (neg)	0
RzB + Twister (neg)	0
RzB + Twister (neg)	0
RzB + Twister (neg)	0
RzB + Twister (neg)	0
RzB + Twister (neg)	0
RzB + Twister (neg)	0
RzB + Twister (neg)	0
RzB + Twister (neg)	0

## Sheet: Table 4-Fig2c
Percentage of mCherry(%)	HH+HdVRz	mirrorT3H48+Twister	RzB+Twister	RzB+HdVRz	HH+Twister	HH+HDV
Rep1	10.24	9.72	66.13	71.13	79.94	75.7
Rep2	2.36	4.48	67.46	66.31	75.15	79.32
Rep3	9.44	30.53	46.75	55.28	74.04	76.01
Rep4	11.3		61.02	68.12	73.22	78.2
mCherry⁺ Percentage — Summary Statistics
Group	N	Mean (%)	SD (%)	SEM (%)	Mean ± SEM (%)
HH + HdVRz	4	8.34	4.06	2.03	8.34 ± 2.03
mirrorT3H48 + Twister	3	14.91	13.78	7.96	14.91 ± 7.96
RzB + Twister	4	60.34	9.48	4.74	60.34 ± 4.74
RzB + HdVRz	4	65.21	6.91	3.46	65.21 ± 3.46
HH + Twister	4	75.59	3.01	1.5	75.59 ± 1.50
HH + HDV	4	77.31	1.74	0.87	77.31 ± 0.87
Note: mirrorT3H48 + Twister n=3 (Rep4 value missing); all other groups n=4.

## Sheet: Table 5-Fig2d
Day	Comparison	P-value	Significance			HH+HDV				HH+Twister				RzB+HDV				RzB+Twister				mirroT3H48+Twister				HH+HdVRz
sup1	HH + HDV vs HH + HdVRz	0.060479828738431926	ns		sup1	372000	69500	639000	796000	508000	207000	1160000	1130000	227000	21200	78100	675000	644000	203000	1260000	847000	801	300	113000	50000	200	200	801	550
sup1	HH + Twister vs HH + HdVRz	0.04981623661234265	*		sup2	3370000	2200000	4930000	4390000	3690000	3960000	5330000	5820000	2680000	323000	1100000	3290000	3560000	2580000	4750000	6830000	36200	901	20100	766000	5180	3060	801	10100
sup1	RzB + HDV vs HH + HdVRz	0.19003938204453935	ns		sup3	1290000	1280000	1320000	2220000	1260000	1700000	2190000	1870000	1210000	1010000	1600000	2100000	1240000	954000	1950000	1670000	225000	6090	16900	1500000	22400	24800	1400	32100
sup1	RzB + Twister vs HH + HdVRz	0.04377197596477817	*		sup4	419000	304000	319000	448000	428000	705000	371000	629000	573000	312000	361000	376000	208000	200000	305000	1030000	407000	21000	15200	746000	64900	28000	3160	87800
sup1	mirroT3H48 + Twister vs HH + HdVRz		N/A		sup5	65900	87800	74600	59900	97400	128000	69500	89800	58300	75600	55300	77100	26200	15700	26300	24900	223000	35900	5680	77100	83700	12000	2760	90800
sup2	HH + HDV vs HH + HdVRz	0.008539725801162376	**
sup2	HH + Twister vs HH + HdVRz	0.00283509614760131	**
sup2	RzB + HDV vs HH + HdVRz	0.07473048255381133	ns
sup2	RzB + Twister vs HH + HdVRz	0.01684716133958666	*
sup2	mirroT3H48 + Twister vs HH + HdVRz		N/A
sup3	HH + HDV vs HH + HdVRz	0.007284667342582857	**
sup3	HH + Twister vs HH + HdVRz	0.0029179737412608204	**
sup3	RzB + HDV vs HH + HdVRz	0.008918567404758963	**
sup3	RzB + Twister vs HH + HdVRz	0.0074530423810005	**
sup3	mirroT3H48 + Twister vs HH + HdVRz		N/A
sup4	HH + HDV vs HH + HdVRz	0.0007389628160675242	***
sup4	HH + Twister vs HH + HdVRz	0.006967240687501407	**
sup4	RzB + HDV vs HH + HdVRz	0.005401144127876214	**
sup4	RzB + Twister vs HH + HdVRz	0.14537868598544346	ns
sup4	mirroT3H48 + Twister vs HH + HdVRz		N/A
sup5	HH + HDV vs HH + HdVRz	0.3694761415497195	ns
sup5	HH + Twister vs HH + HdVRz	0.12681584310005853	ns
sup5	RzB + HDV vs HH + HdVRz	0.47288035653273297	ns
sup5	RzB + Twister vs HH + HdVRz	0.37678184505766754	ns
sup5	mirroT3H48 + Twister vs HH + HdVRz		N/A

## Sheet: Table 6 Fig4
Group	Replicate	Brain_Region	Total_UMI	Absolute_Diversity	Shannon_Index	Effective_Capacity	Information_Density
HH + HdVRz	1	LGN	281203	911	5.1514	172.67	32.4
HH + HdVRz	2	LGN	163414	731	4.7622	117	44.73
HH + HdVRz	3	LGN	61746	618	4.7134	111.43	100.09
HH + HdVRz	1	V1_Cortex	349518	911	4.9351	139.08	26.06
HH + HdVRz	2	V1_Cortex	516507	1004	5.459	234.87	19.44
HH + HdVRz	3	V1_Cortex	357471	937	5.057	157.12	26.21
HH + Twister	1	LGN	43816	2225	6.2921	540.3	507.81
HH + Twister	2	LGN	117261	2756	5.6026	271.14	235.03
HH + Twister	3	LGN	70393	2038	6.4749	648.68	289.52
HH + Twister	1	V1_Cortex	180023	5604	7.0378	1138.87	311.29
HH + Twister	2	V1_Cortex	340259	3842	6.5744	716.5	112.91
HH + Twister	3	V1_Cortex	390568	2517	5.2627	193.01	64.44
RzB + Twister	1	LGN	23939	1119	5.3519	211.01	467.44
RzB + Twister	2	LGN	19274	1210	6.3429	568.42	627.79
RzB + Twister	3	LGN	110470	2587	6.5863	725.1	234.18
RzB + Twister	1	V1_Cortex	77788	3185	6.4547	635.66	409.45
RzB + Twister	2	V1_Cortex	110765	1736	5.6631	288.05	156.73
RzB + Twister	3	V1_Cortex	244402	2253	4.8459	127.22	92.18

## Sheet: Table 7 Fig5c
Group	Replicate	Brain_Region	Collision_Level	Proportion
HH + HdVRz	1	V1_Cortex	>3 (High)	48.07903402854007
HH + HdVRz	1	V1_Cortex	1 (Unique)	28.43029637760702
HH + HdVRz	1	V1_Cortex	2 (Low)	14.37980241492865
HH + HdVRz	1	V1_Cortex	3 (Med)	9.11086717892426
HH + HdVRz	1	LGN	>3 (High)	54.88474204171241
HH + HdVRz	1	LGN	1 (Unique)	21.185510428100987
HH + HdVRz	1	LGN	2 (Low)	14.1602634467618
HH + HdVRz	1	LGN	3 (Med)	9.769484083424809
HH + HdVRz	2	V1_Cortex	>3 (High)	56.37450199203188
HH + HdVRz	2	V1_Cortex	1 (Unique)	22.709163346613543
HH + HdVRz	2	V1_Cortex	2 (Low)	12.350597609561753
HH + HdVRz	2	V1_Cortex	3 (Med)	8.565737051792828
HH + HdVRz	2	LGN	>3 (High)	52.39398084815321
HH + HdVRz	2	LGN	1 (Unique)	25.718194254445965
HH + HdVRz	2	LGN	2 (Low)	14.36388508891929
HH + HdVRz	2	LGN	3 (Med)	7.523939808481532
HH + HdVRz	3	V1_Cortex	>3 (High)	45.78441835645678
HH + HdVRz	3	V1_Cortex	1 (Unique)	29.562433297758805
HH + HdVRz	3	V1_Cortex	2 (Low)	15.36819637139808
HH + HdVRz	3	V1_Cortex	3 (Med)	9.28495197438634
HH + HdVRz	3	LGN	>3 (High)	42.88025889967638
HH + HdVRz	3	LGN	1 (Unique)	31.22977346278317
HH + HdVRz	3	LGN	2 (Low)	16.34304207119741
HH + HdVRz	3	LGN	3 (Med)	9.546925566343042
HH + Twister	1	V1_Cortex	1 (Unique)	50.999286224125626
HH + Twister	1	V1_Cortex	>3 (High)	24.018558172733762
HH + Twister	1	V1_Cortex	2 (Low)	16.131334760885082
HH + Twister	1	V1_Cortex	3 (Med)	8.850820842255532
HH + Twister	1	LGN	1 (Unique)	55.0561797752809
HH + Twister	1	LGN	>3 (High)	18.382022471910112
HH + Twister	1	LGN	2 (Low)	17.752808988764045
HH + Twister	1	LGN	3 (Med)	8.808988764044944
HH + Twister	2	V1_Cortex	1 (Unique)	43.67516918271733
HH + Twister	2	V1_Cortex	>3 (High)	30.68714211348256
HH + Twister	2	V1_Cortex	2 (Low)	16.371681415929203
HH + Twister	2	V1_Cortex	3 (Med)	9.2660072878709
HH + Twister	2	LGN	1 (Unique)	46.335268505079824
HH + Twister	2	LGN	>3 (High)	26.48766328011611
HH + Twister	2	LGN	2 (Low)	17.48911465892598
HH + Twister	2	LGN	3 (Med)	9.687953555878085
HH + Twister	3	V1_Cortex	1 (Unique)	46.92093762415574
HH + Twister	3	V1_Cortex	>3 (High)	26.340882002383793
HH + Twister	3	V1_Cortex	2 (Low)	16.050854191497816
HH + Twister	3	V1_Cortex	3 (Med)	10.687326181962655
HH + Twister	3	LGN	1 (Unique)	42.492639842983316
HH + Twister	3	LGN	>3 (High)	29.83316977428852
HH + Twister	3	LGN	2 (Low)	17.909715407262023
HH + Twister	3	LGN	3 (Med)	9.764474975466143
RzB + Twister	1	V1_Cortex	1 (Unique)	51.45996860282575
RzB + Twister	1	V1_Cortex	>3 (High)	23.014128728414445
RzB + Twister	1	V1_Cortex	2 (Low)	16.452119309262166
RzB + Twister	1	V1_Cortex	3 (Med)	9.073783359497645
RzB + Twister	1	LGN	1 (Unique)	54.60232350312779
RzB + Twister	1	LGN	2 (Low)	20.732797140303845
RzB + Twister	1	LGN	>3 (High)	16.71134941912422
RzB + Twister	1	LGN	3 (Med)	7.953529937444147
RzB + Twister	2	V1_Cortex	1 (Unique)	51.555299539170505
RzB + Twister	2	V1_Cortex	2 (Low)	21.140552995391705
RzB + Twister	2	V1_Cortex	>3 (High)	17.741935483870968
RzB + Twister	2	V1_Cortex	3 (Med)	9.56221198156682
RzB + Twister	2	LGN	1 (Unique)	57.35537190082645
RzB + Twister	2	LGN	2 (Low)	19.669421487603305
RzB + Twister	2	LGN	>3 (High)	13.966942148760332
RzB + Twister	2	LGN	3 (Med)	9.008264462809917
RzB + Twister	3	V1_Cortex	1 (Unique)	50.909897913892586
RzB + Twister	3	V1_Cortex	>3 (High)	22.769640479360852
RzB + Twister	3	V1_Cortex	2 (Low)	16.46693297825122
RzB + Twister	3	V1_Cortex	3 (Med)	9.85352862849534
RzB + Twister	3	LGN	1 (Unique)	37.804406648627754
RzB + Twister	3	LGN	>3 (High)	37.301894085813686
RzB + Twister	3	LGN	2 (Low)	16.466950135291842
RzB + Twister	3	LGN	3 (Med)	8.426749130266717

## Sheet: Table 8 Fig5de
Group	Replicate	Brain_Region	Total_Cells	Collision_Free_Pct	Collision_Affected_Pct
HH + HdVRz	1	V1_Cortex	6584	2.4301336573511545	97.56986634264885
HH + HdVRz	1	LGN	12267	1.0842096682155375	98.91579033178446
HH + HdVRz	2	V1_Cortex	13402	0.9103118937472019	99.0896881062528
HH + HdVRz	2	LGN	12449	1.108522772913487	98.89147722708651
HH + HdVRz	3	V1_Cortex	6246	2.2894652577649697	97.71053474223504
HH + HdVRz	3	LGN	5073	3.0553912872067808	96.94460871279323
HH + Twister	1	V1_Cortex	15187	10.021729110423388	89.97827088957662
HH + Twister	1	LGN	6280	14.140127388535031	85.85987261146497
HH + Twister	2	V1_Cortex	12262	7.600717664328821	92.39928233567119
HH + Twister	2	LGN	11563	7.800743751621551	92.19925624837845
HH + Twister	3	V1_Cortex	8537	7.813049080473235	92.18695091952677
HH + Twister	3	LGN	8103	7.392323830679995	92.6077
RzB + Twister	1	V1_Cortex	8543	11.611845955753248	88.38815404424675
RzB + Twister	1	LGN	2468	19.813614262560776	80.18638573743922
RzB + Twister	2	V1_Cortex	2821	14.285714285714285	85.71428571428571
RzB + Twister	2	LGN	2422	23.162675474814204	76.8373245251858
RzB + Twister	3	V1_Cortex	7229	9.91838428551667	90.08161571448333
RzB + Twister	3	LGN	13589	5.1806608286113764	94.81933917138863

## Sheet: Table 9 Fig6
Group	Replicate	Pure_Network_Edges	Mean_In_Degree	Mean_Out_Degree	Mean_Singlet_Out_Degree
HH + HdVRz	1	1079	1.1727	69.5334	8.4297
HH + HdVRz	2	192	1.1122	71.0665	3.3684
HH + HdVRz	3	369	1.0934	29.8424	5.8571
HH + Twister	1	676	1.1685	14.5331	2.3151
HH + Twister	2	1441	1.1849	37.9936	4.6186
HH + Twister	3	1020	1.1715	14.8293	3.6042
RzB + Twister	1	253	1.1532	23.6466	1.6755
RzB + Twister	2	429	1.1453	25.421	2.2579
RzB + Twister	3	2096	1.2099	50.4259	5.0874
